# Supplementary material
Source: Elsevier journal article supplement (https://www.sciencedirect.com/science/article/pii/S0300289622004872)

Supplementary Figure 1 Expression levels of SNHG5, miR-181c-5p and CBX4 in different types of NSCLC. A. Expression level of SNHG5 in different types of NSCLC; B. Expression level of miR-181c-5p in different types of NSCLC; C. Expression level of CBX4 in different types of NSCLC. Measurement data were expressed as mean  $\pm$  standard deviation. ns  $P > 0.05$ ; adenocarcinoma (n = 38), squamous cell carcinoma (n = 31) and large cell carcinoma (n = 17).

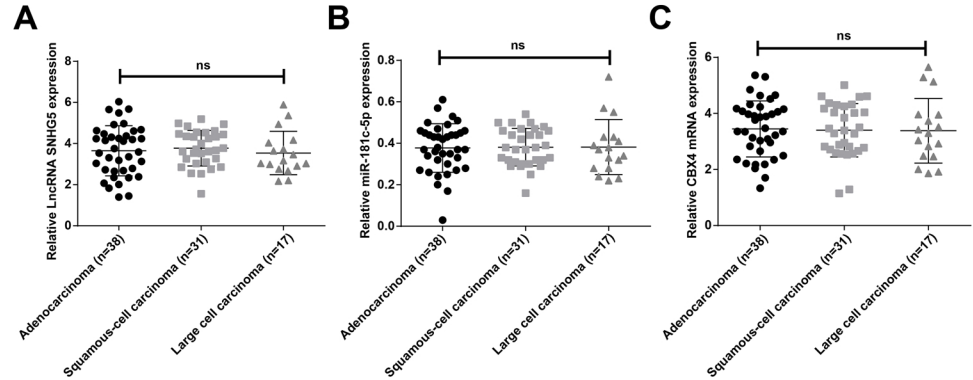

Supplement: mmc1 [file S0300289622004872:mmc1.pdf]
